# Supplementary material
Source: PubMed Central journal article supplement (PMC1622800)

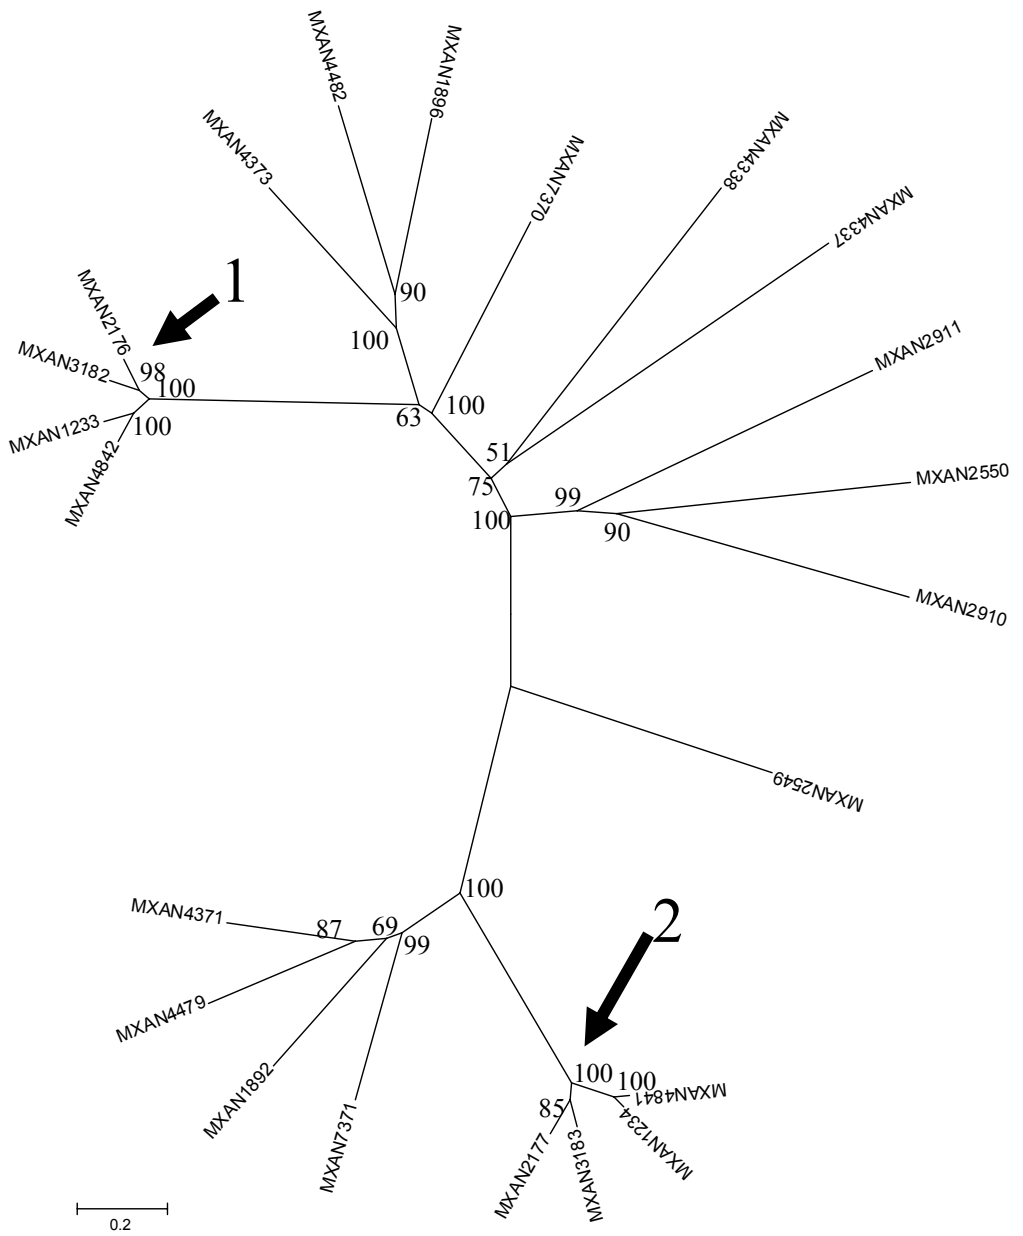

### B. Gene order of possible recent duplication pairs

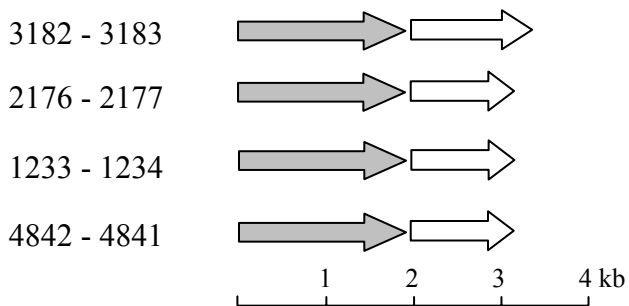

### C. Older gene pair duplications

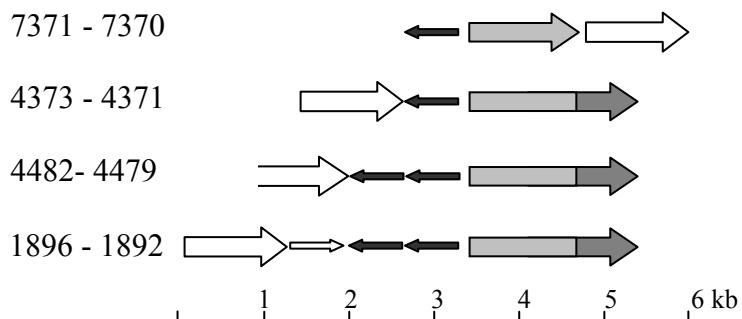

Supplement: pnas_0607335103_1.pdf [file pnas_0607335103_1.pdf]
